# Supplementary material
Source: publisher site journal article supplement (https://www.kjim.org/upload/media/kjim-2025-171-Supplementary-Table-2.pdf)
Supplement: Supplementary file 1 [file kjim-2025-171-Supplementary-Table-2.pdf]

**Supplementary Table 2. Representative population**

| Category                                 |                                                                                                                                                                                                                                                                                                                                                                                                                  |
|------------------------------------------|------------------------------------------------------------------------------------------------------------------------------------------------------------------------------------------------------------------------------------------------------------------------------------------------------------------------------------------------------------------------------------------------------------------|
| Disease                                  | <ul style="list-style-type: none"> <li>• Exposure: herpes zoster vaccination</li> <li>• Outcome: hepatobiliary diseases</li> </ul> <p>Hepatobiliary diseases are defined as hepatic failure, chronic hepatitis, Inflammatory liver disease, liver cirrhosis, cholelithiasis, cholecystitis &amp; cholangitis, acute pancreatitis, other diseases of the gallbladder and other diseases of the pancreas.</p>      |
| Special considerations related to        |                                                                                                                                                                                                                                                                                                                                                                                                                  |
| Sex                                      | Males had a lower risk of developing every hepatobiliary disease after vaccination than females.                                                                                                                                                                                                                                                                                                                 |
| Age                                      | The association between age and hepatobiliary diseases remained consistent across all subtypes. Following vaccination, individuals under 60 years had a significantly lower risk of all hepatobiliary diseases compared to those aged 60 years.                                                                                                                                                                  |
| Socioeconomic status                     | The incidence of hepatobiliary diseases was found to be lower among individuals with low socioeconomic status after vaccination compared to those with middle or high socioeconomic status.                                                                                                                                                                                                                      |
| Geography of urban-rural interaction     | The incidence rate of hepatobiliary diseases was observed to be lower among individuals living in rural areas.                                                                                                                                                                                                                                                                                                   |
| Other considerations                     | Individuals with unhealthy lifestyles, such as smoking, excessive alcohol consumption, and insufficient physical activity, exhibited a lower incidence rate of hepatobiliary diseases following vaccination. In addition, those taking medications for coronary artery disease, hyperlipidemia, hypertension and diabetes had a reduced risk of hepatobiliary disease post-vaccination.                          |
| Overall representativeness of this study | Utilizing the Korean nationwide cohort of over four million individuals, we conducted a comprehensive evaluation of the risk of hepatobiliary diseases following herpes zoster vaccination compared to non-vaccinated controls. This study represents the most extensive analysis to date, offering a thorough assessment of the vaccine's potential protective effects against hepatobiliary disease incidence. |
